# Supplementary material for: Calpain system protein expression and activity in ovarian cancer
Source: Springer Nature journal article supplement (doi:10.1007/s00432-018-2794-2), 2018-11-17
Supplement: MOESM1 [file 16277334]

# Calpain system protein expression and activity in ovarian cancer

Journal of Cancer Research and Clinical Oncology

Siwei Zhang<sup>1</sup>, Suha Deen<sup>2</sup>, Sarah J Storr<sup>1</sup>, Panagiota S Chondrou<sup>1,3</sup>, Holly Nicholls<sup>1</sup>, Anqi Yao<sup>1</sup>, Ployphailin Rungsakaolert<sup>1</sup>, Stewart G Martin<sup>1,4</sup>

1 Academic Clinical Oncology, Nottingham Breast Cancer Research Centre, School of Medicine, University of Nottingham, Nottingham University Hospitals NHS Trust, City Hospital Campus, Nottingham, NG5 1PB, UK.

2 Department of Histopathology, Queen's Medical Centre, Nottingham University Hospitals NHS Trust, Nottingham, NG7 2UH, UK

3 Current address: Lungs for Living Research Centre, UCL Respiratory, University College London, 5 University Street London, WC1E 6JF United Kingdom.

4 Corresponding author: Academic Clinical Oncology, Nottingham Breast Cancer Research Centre, School of Medicine, University of Nottingham, Nottingham University Hospitals NHS Trust, City Hospital Campus, Nottingham, NG5 1PB, UK

Telephone: +44(0)115 823 1846

Email: [stewart.martin@nottingham.ac.uk](mailto:stewart.martin@nottingham.ac.uk).

## Supplements

**Table S1 Treatment received by the ovarian cancer patients in present study**

| <b>Treatment</b>                                                                   | <b>Number of Patients</b> | <b>Frequency (%)*</b> |
|------------------------------------------------------------------------------------|---------------------------|-----------------------|
| <b>Carboplatin</b>                                                                 | 148                       | 25.7                  |
| <b>Carboplatin and paclitaxel (taxol ®)</b>                                        | 160                       | 27.8                  |
| <b>Carboplatin and docetaxel (Taxotere ®)</b>                                      | 2                         | 0.3                   |
| <b>Carboplatin, docetaxel and irinotecan (Campto ®)</b>                            | 1                         | 0.2                   |
| <b>Carboplatin, paclitaxel and topotecan (Hycamtin ®)</b>                          | 3                         | 0.5                   |
| <b>Carboplatin, paclitaxel and bevacizumab</b>                                     | 1                         | 0.2                   |
| <b>Carboplatin and cyclophosphamide</b>                                            | 5                         | 0.9                   |
| <b>Carboplatin, cyclophosphamide and doxorubicin (adriamycin)</b>                  | 21                        | 3.7                   |
| <b>Carboplatin and topotecan</b>                                                   | 9                         | 1.6                   |
| <b>Carboplatin and radiotherapy (HGSC)</b>                                         | 1                         | 0.2                   |
| <b>Carboplatin, paclitaxel and radiotherapy (HGSC)</b>                             | 1                         | 0.2                   |
| <b>CAP: cyclophosphamide, doxorubicin and cisplatin</b>                            | 5                         | 0.9                   |
| <b>Chlorambucil (Leukeran ®)</b>                                                   | 2                         | 0.3                   |
| <b>Topotecan (Hycamtin ®)</b>                                                      | 2                         | 0.3                   |
| <b>Gemcitabine (Gemzar ®)</b>                                                      | 1                         | 0.2                   |
| <b>No chemotherapy</b>                                                             | 74                        | 12.9                  |
| <b>Radiotherapy (HGSC and endometrioid carcinoma)</b>                              | 2                         | 0.3                   |
| <b>Radiotherapy and progesterone (endometrioid carcinoma)</b>                      | 1                         | 0.2                   |
| <b>Dexamethasone and radiotherapy for lung metastasis (endometrioid carcinoma)</b> | 1                         | 0.2                   |
| <b>BIBF 1120 (Nintedanib)</b>                                                      | 2                         | 0.3                   |

\* Percentage of the total cohort (n=575).

**Table S2 Spearman's rank correlation coefficient between calpain-1, -2, -4 and calpastatin expression**

|                    |                                | <b>Calpain-1</b> | <b>Calpain-2</b> | <b>Calpain-4</b> |
|--------------------|--------------------------------|------------------|------------------|------------------|
| <b>Calpastatin</b> | <b>Correlation Coefficient</b> | <b>0.480**</b>   | <b>0.205**</b>   | <b>0.514**</b>   |
|                    | <b>Sig. (2-tailed)</b>         | 2.4147E-28       | 0.000008         | 6.783E-33        |
| <b>Calpain-1</b>   | <b>Correlation Coefficient</b> | \                | <b>.300**</b>    | <b>0.481**</b>   |
|                    | <b>Sig. (2-tailed)</b>         | \                | 3.3557E-11       | 1.5002E-28       |
| <b>Calpain-2</b>   | <b>Correlation Coefficient</b> | \                | \                | <b>0.296**</b>   |
|                    | <b>Sig. (2-tailed)</b>         | \                | \                | 6.4717E-11       |

\*\* Correlation is significant at the 0.01 level (2-tailed).

\* Correlation is significant at the 0.05 level (2-tailed).

Significant P-values are indicated by bold type.

**Table S3 Kaplan–Meier survival analysis in different subgroups of ovarian cancer**

|                                                                | <i>P</i> value (confidence interval: 99%) |           |           |           |
|----------------------------------------------------------------|-------------------------------------------|-----------|-----------|-----------|
|                                                                | Calpastatin                               | Calpain-1 | Calpain-2 | Calpain-4 |
| <b>Histological subtypes</b>                                   |                                           |           |           |           |
| <b>HGSC (n=265)</b>                                            | 0.002                                     | 0.658     | 0.011     | 0.064     |
| <b>Mucinous carcinoma (n=45)</b>                               | 0.497                                     | 0.448     | 0.556     | 0.014     |
| <b>Endometrioid carcinoma (n=53)</b>                           | 0.415                                     | 0.617     | 0.713     | 0.899     |
| <b>CCC (n=41)</b>                                              | 0.564                                     | 0.308     | 0.826     | 0.461     |
| <b>LGSC (n=24)</b>                                             | 0.930                                     | 0.866     | 0.257     | 0.987     |
| <b>Stage</b>                                                   |                                           |           |           |           |
| <b>Stage 1 (confined tumour) (n=163)</b>                       | 0.019                                     | 0.997     | 0.634     | 0.011     |
| <b>Stage 2, 3 &amp; 4 (tumour spread) (n=286)</b>              | 0.008                                     | 0.766     | 0.025     | 0.044     |
| <b>Stage 1, 2 &amp; 3 (without distant metastasis) (n=416)</b> | 0.019                                     | 0.195     | 0.078     | 0.004     |
| <b>Stage 4 (with distant metastasis) (n=33)</b>                | 0.976                                     | 0.254     | 0.024     | 0.963     |
| <b>Sensitivity to platinum-based chemotherapy</b>              |                                           |           |           |           |
| <b>Sensitive (n=213)</b>                                       | 0.050                                     | 0.049     | 0.435     | 0.036     |
| <b>Resistant (n=39)</b>                                        | 0.798                                     | 0.815     | 0.076     | 0.433     |
| <b>Residual disease</b>                                        |                                           |           |           |           |
| <b>No residual tumour (n=250)</b>                              | 0.085                                     | 0.988     | 0.244     | 0.026     |
| <b>residual tumour (n=153)</b>                                 | 0.002                                     | 0.361     | 0.594     | 0.012     |

**Table S4 Profiler PCR array results (PEO4 cells vs. PEO1 cells).**

| Refseq    | Gene     | Description                                                  | Fold-change |   |        |   |
|-----------|----------|--------------------------------------------------------------|-------------|---|--------|---|
|           |          |                                                              | 4h          |   | 24h    |   |
| PPH00527A | BMP7     | Bone morphogenetic protein 7                                 | 259.84      | A | 351.79 | A |
| PPH00439F | COL3A1   | Collagen, type III, alpha 1 chain precursor                  | 75.56       | A | 107.55 | A |
| PPH00152E | MMP9     | Matrix metalloproteinase 9                                   | 4.38        | A | 2.88   | B |
| PPH20529A | NUDT13   | Nudix (nucleoside diphosphate linked moiety X)-type motif 13 | 4.17        | A | 3.53   | B |
| PPH01944B | NODAL    | Nodal homolog (mouse)                                        | 11.16       | B | 16.07  | B |
| PPH09021B | ZEB2     | Zinc finger E-box binding homeobox 2                         | 2.11        | B | 11.02  | B |
| PPH00781A | COL5A2   | Collagen, type V, alpha 2                                    | 4.47        | B | 7.66   | B |
| PPH02389A | KRT14    | Keratin 14                                                   | 5.22        | B | 5.40   | B |
| PPH00215F | SERPINE1 | Serpin peptidase inhibitor, clade E, member 1                | 4.68        | B | \      | \ |
| PPH00235F | MMP3     | Matrix metalloproteinase 3                                   | 4.24        | B | \      | \ |
| PPH02459B | SNAI1    | Snail homolog 1 (Drosophila)                                 | 3.22        | B | \      | \ |
| PPH02399C | WNT11    | Wingless-type MMTV integration site family, member 11        | 3.15        | B | 2.57   | B |
| PPH00531F | TGFB3    | Transforming growth factor, beta 3                           | 2.72        | B | \      | \ |
| PPH00526C | NOTCH1   | Notch 1                                                      | 2.48        | B | \      | \ |
| PPH11409A | TMEM132A | Transmembrane protein 132A                                   | 6.29        | A | -2.27  | A |
| PPH02410A | WNT5A    | Wingless-type MMTV integration site family, member 5A        | -13.74      | A | -10.28 | A |
| PPH06022B | JAG1     | Jagged 1                                                     | -11.73      | A | -7.15  | A |
| PPH00524B | TGFB2    | Transforming growth factor, beta 2                           | -2.05       | \ | -9.22  | A |
| PPH02475A | SNAI2    | Snail homolog 2 (Drosophila)                                 | -2.72       | \ | -6.98  | A |
| PPH02447C | WNT5B    | Wingless-type MMTV integration site family, member 5B        | -5.32       | \ | -5.47  | A |
| PPH00176C | ITGA5    | Integrin, $\alpha$ 5 (fibronectin receptor)                  | -3.90       | A | -2.25  | A |
| PPH00582E | SPP1     | Secreted phosphoprotein 1                                    | \           | \ | -3.23  | A |
| PPH00515B | BMP1     | Bone morphogenetic protein 1                                 | -2.86       | A | -2.41  | A |
| PPH00555G | IL1RN    | Interleukin 1 receptor antagonist                            | -2.70       | A | -2.44  | A |
| PPH00636F | CDH2     | N-cadherin                                                   | -2.21       | A | -17.91 | B |
| PPH00151B | MMP2     | Matrix metalloproteinase 2                                   | -13.11      | B | -8.84  | B |
| PPH01971A | FOXC2    | Forkhead box C2                                              | -5.70       | B | \      | \ |
| PPH01922A | ZEB1     | Zinc finger E-box binding homeobox 1                         | \           | \ | -3.85  | B |
| PPH15155C | SNAI3    | Snail homolog 3 (Drosophila)                                 | -2.02       | B | \      | \ |

A: This gene's expression is relatively low (threshold cycle > 30) in one sample and reasonably detected (threshold cycle < 30) in the other sample suggesting that the actual fold-change value is at least as large as the calculated and reported fold-change result.

B: This gene's relative expression level is low (threshold cycle > 30), in both control and test samples.

**Table S5 Profiler PCR array results for PEO1 and PEO4 cells (calpeptin-treated group vs. vehicle control group at two time points).**

| Gene                                          | Description                                                                            | Fold-change |            |
|-----------------------------------------------|----------------------------------------------------------------------------------------|-------------|------------|
|                                               |                                                                                        | 4h          | 24h        |
| <b>Up-regulated gene expression in PEO1</b>   |                                                                                        | <b>4h</b>   | <b>24h</b> |
| <b>ZEB2</b>                                   | Zinc finger E-box binding homeobox 2                                                   | 3.21 (B)    | 4.32 (B)   |
| <b>BMP2</b>                                   | Bone morphogenetic protein 2                                                           | \           | 2.71 (B)   |
| <b>BMP7</b>                                   | Bone morphogenetic protein 7                                                           | 2.04 (B)    | \          |
| <b>Up-regulated genes in PEO4</b>             |                                                                                        | <b>4h</b>   | <b>24h</b> |
| <b>CDH2</b>                                   | Cadherin 2, type 1, N-cadherin (neuronal)                                              | \           | 8.76 (B)   |
| <b>KRT14</b>                                  | Keratin 14                                                                             | 2.72(B)     | 2.18 (B)   |
| <b>MMP2</b>                                   | Matrix metalloproteinase 2 (gelatinase A, 72kDa gelatinase, 72kDa type IV collagenase) | 2.40(B)     | \          |
| <b>SNAI3</b>                                  | Snail homolog 3 (Drosophila)                                                           | 2.39(B)     | \          |
| <b>ZEB2</b>                                   | Zinc finger E-box binding homeobox 2                                                   | 2.37(B)     | \          |
| <b>Down-regulated gene expression in PEO1</b> |                                                                                        | <b>4h</b>   | <b>24h</b> |
| <b>MMP9</b>                                   | Matrix metalloproteinase 9 (gelatinase B, 92kDa gelatinase, 92kDa type IV collagenase) | -3.06 (B)   | \          |
| <b>NOTCH1</b>                                 | Notch 1                                                                                | -2.20 (B)   | \          |
| <b>Down-regulated gene expression in PEO4</b> |                                                                                        | <b>4h</b>   | <b>24h</b> |
| <b>NODAL</b>                                  | Nodal homolog (mouse)                                                                  | -2.99 (B)   | -9.83 (B)  |
| <b>WNT11</b>                                  | Wingless-type MMTV integration site family, member 11                                  | -2.03 (B)   | -2.06 (B)  |
| <b>ZEB1</b>                                   | Zinc finger E-box binding homeobox 1                                                   | -2.40 (B)   |            |
| <b>ZEB2</b>                                   | Zinc finger E-box binding homeobox 2                                                   |             | -4.71 (B)  |
